# Supplementary material for: 3D nanostructured N-doped TiO2 photocatalysts with enhanced visible absorption
Source: Royal Society of Chemistry journal article supplement (doi:10.1039/c8nr02330a), 2018-01-01
Supplement: c8nr02330a1.pdf [file c8nr02330a1.pdf]

## **Electronic Supplementary Information (ESI)**

# **3D Nanostructured N-doped TiO<sub>2</sub> Photocatalysts with Enhanced Visible Absorption**

Sumin Cho,<sup>†,§</sup> Changui Ahn,<sup>†,§</sup> Junyong Park<sup>‡,\*</sup> and Seokwoo Jeon<sup>†,\*</sup>

<sup>†</sup>Department of Materials Science and Engineering, KAIST Institute for The Nanocentury,  
KAIST, Daejeon 305-701, Republic of Korea

<sup>‡</sup>School of Materials Science and Engineering, Kumoh National Institute of Technology,  
Gumi, Gyeongbuk 39177, Republic of Korea

<sup>§</sup>These authors contributed equally

<sup>\*</sup>To whom all correspondence should be addressed: S. J. (jeon39@kaist.ac.kr) and J. P.  
(jpark@kumoh.ac.kr)

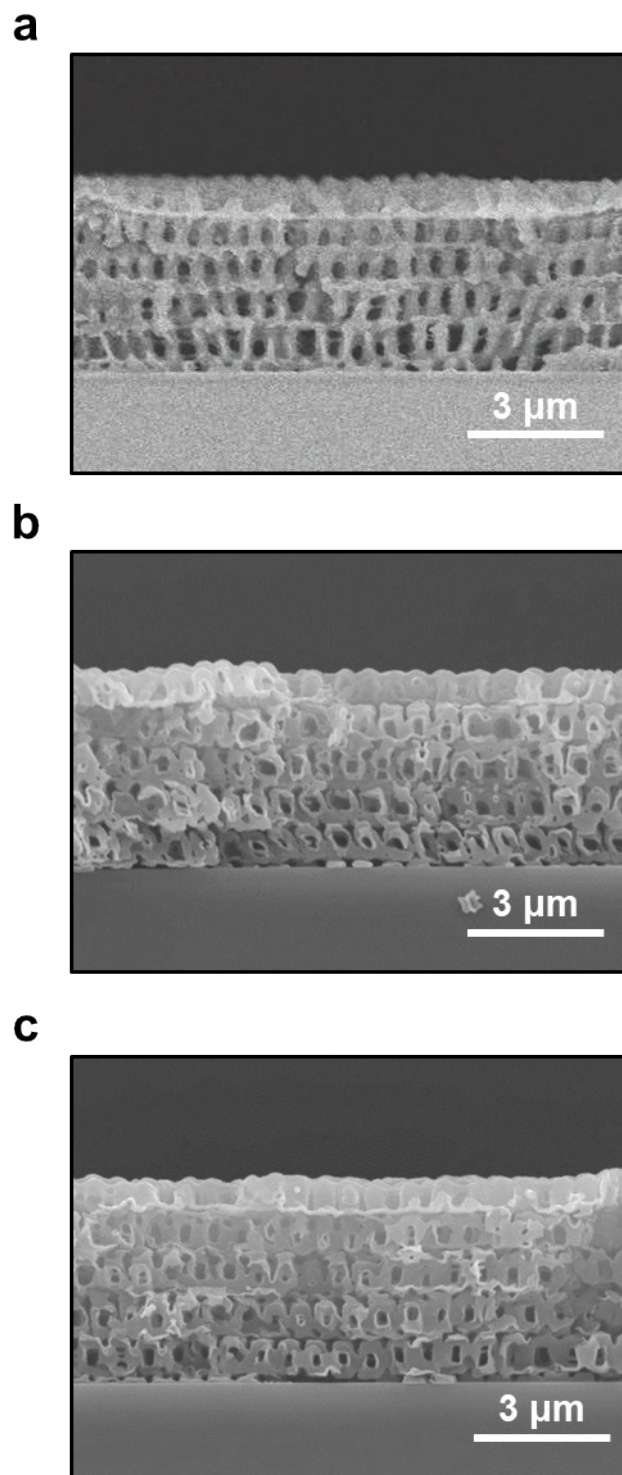

**Figure S1.** Cross-sectional SEM Image of (a) 3D polymer template, (b) 3D TiO<sub>2</sub> and (c) TiN coated 3D TiO<sub>2</sub>.

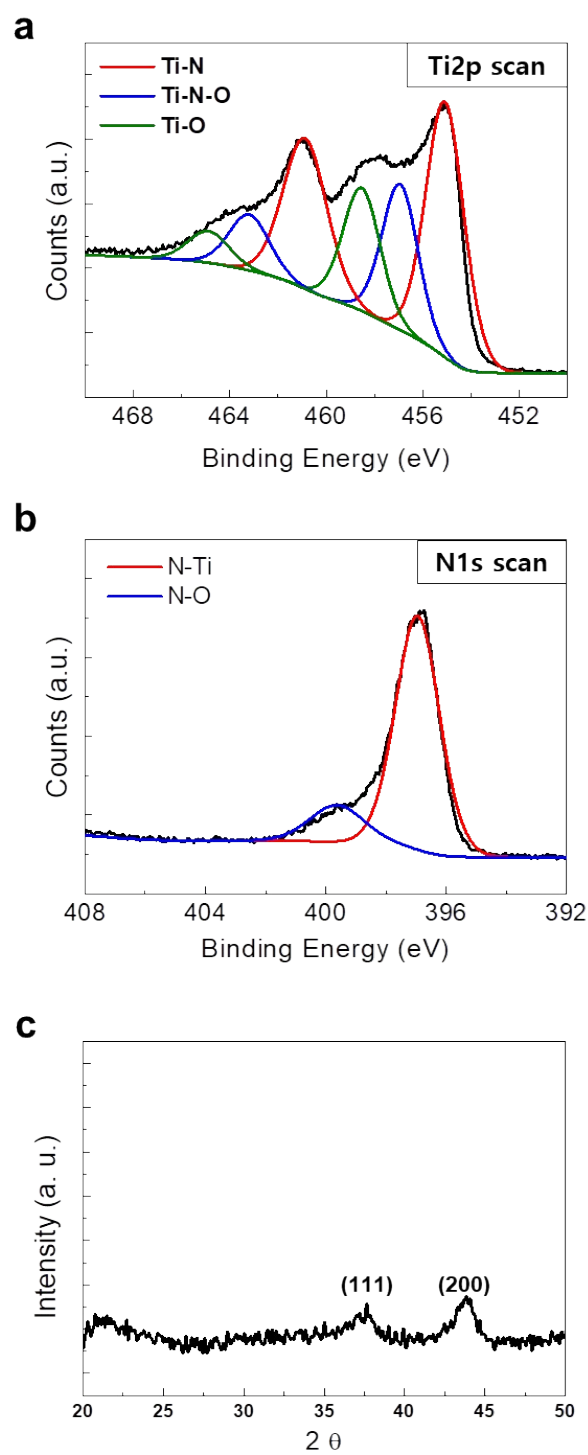

**Figure S2.** Characterization of TiN deposited by ALD. (a) XPS Ti2p scan, (b) XPS N1s scan and (c) XRD graph of TiN.

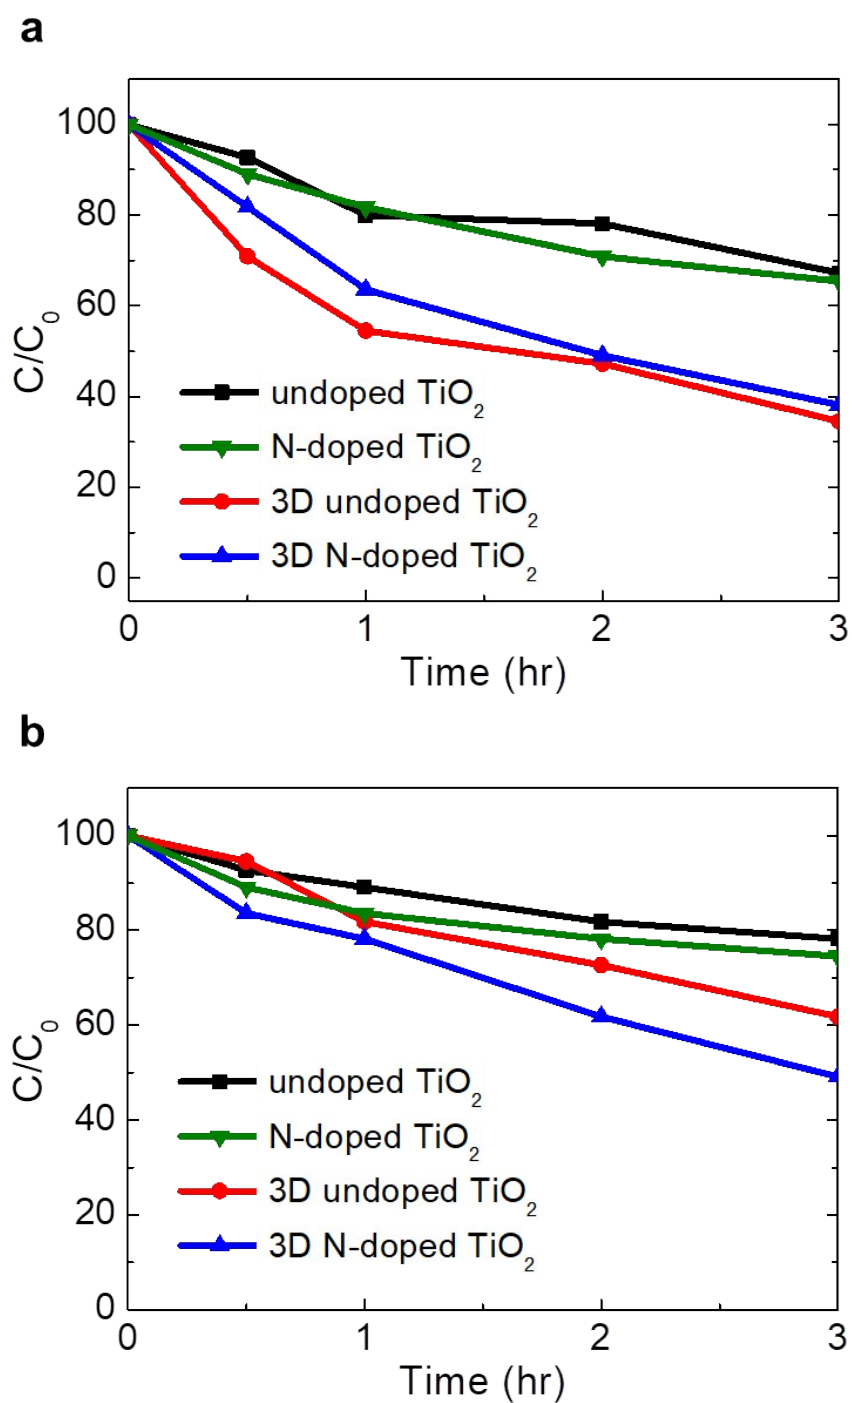

**Figure S3.** Time-dependent absorbance change of methylene blue (MB) solutions with undoped  $\text{TiO}_2$  film, 3D undoped  $\text{TiO}_2$  film, and 3D N-doped  $\text{TiO}_2$  film, under (a) UV and (b) solar irradiation.

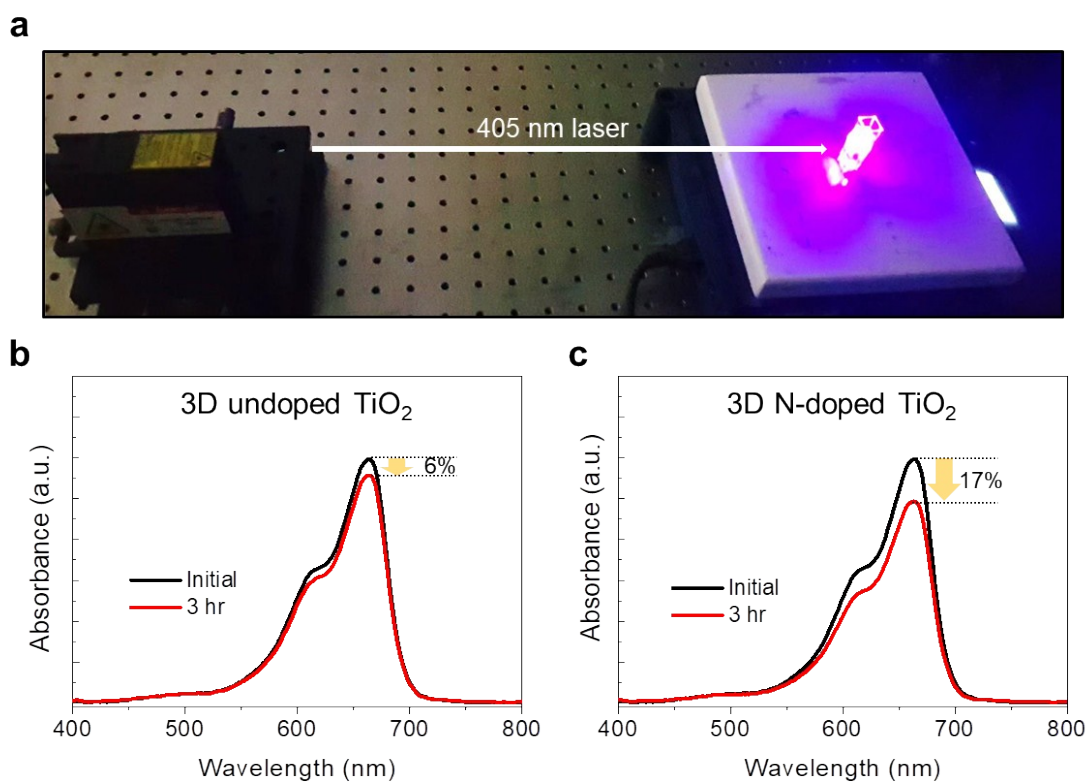

**Figure S4.** Measurement of photocatalytic activity under visible irradiation. (a) Digital image of diode laser (wavelength: 405 nm) set-up for measuring visible photocatalytic activity. Absorbance change of methylene blue (MB) solutions with (b) 3D undoped  $\text{TiO}_2$  film and (c) 3D N-doped  $\text{TiO}_2$  film under visible irradiation.
